# Supplementary material for: Room-temperature crystallography reveals altered binding of small-molecule fragments to PTP1B
Source: eLife. 2023 Mar 7;12:e84632. doi: 10.7554/eLife.84632 (PMC9991056; doi:10.7554/eLife.84632)
Supplement: Figure 1—figure supplement 2—source data 1. — Values shown are averages across all wedges within each cluster. See Figure 1—figure supplement 2 for visualization of clusters using cluster4x. [file elife-84632-fig1-figsupp2-data1.csv]

		Cluster 1	Cluster 2	Cluster 3
Pre-merging	No. of wedges	184	201	236
	Mean resolution (A)	2.37	2.07	2.27
	Mean a b c (A)	89.5 89.5 106.3	89.6 89.6 106.3	89.5 89.5 106.2
	Mean Rmerge	0.1384	0.1	0.1242
	Mean Rmeas	0.172	0.125	0.1541
Post-merging	No. of datasets	41	40	47
	Mean resolution (A)	2.17	1.85	1.98
	Mean completeness	97.20%	99.30%	98.00%
	Mean a b c (A)	89.5 89.5 106.3	89.6 89.6 106.3	89.5 89.5 106.2
	Mean Rmerge	0.2093	0.1692	0.2025
	Mean Rmeas	0.2289	0.1803	0.2176
