# Supplementary material for: Room-temperature crystallography reveals altered binding of small-molecule fragments to PTP1B
Source: eLife. 2023 Mar 7;12:e84632. doi: 10.7554/eLife.84632 (PMC9991056; doi:10.7554/eLife.84632)
Supplement: Table 2—source data 1. — * The fragment pose is the same but the protein conformation is altered at RT vs. cryo. ** We assume the cryo pose is different but the cryo model was not published since the ligand density was poorly defined. [file elife-84632-table2-data1.csv]

Screen	Dataset	RT Pose Category	Notes
1-xtal	PTP1B-z0007_x2_2	same site; same pose
	PTP1B-z0015_x2_1	same site; same pose
	PTP1B-z0021_x1_2	same site; same pose	Found at cryo 1-BDC
	PTP1B-z0025_x1_1	same site; same pose
	PTP1B-z0028_x1_1	same site; same pose
	PTP1B-z0033_x2_1	same site; same pose	Found at cryo 1-BDC
	PTP1B-z0089_x1_3	same site; same pose	Also done in-situ
	PTP1B-z0102_x1_2	same site; same pose	Also done in-situ
	PTP1B-z0115_x1_1	same site; same pose / same site; new pose	Found at cryo 1-BDC; only 1/2 fragments bind
	PTP1B-z0055_x1_2	same site; new pose	Ligand flips; active site
	PTP1B-z0110_x1_1	same site; new pose*	Also done in-situ; extended Lys density
	PTP1B-z0032_x1_1	same site; new pose*	Protein moves: L16 closed; WPD open and closed
	PTP1B-z0042_x1_1	new site
	PTP1B-z0048_x1_2 - event 3	new site	Cryo-non-hit; extended Lys density; Lys197
	PTP1B-z0048_x1_2 - event 1	new site	Cryo-non-hit; extended Lys density; Lys237
in-situ	PTP1B_is2-x0158-x0192-x0243-x0275	same site; same pose	Found in cluster 1 (also found in all-wedges but pose was ambiguous)
	PTP1B_is2-x0224	same site; same pose
	PTP1B_is2-x0228	same site; same pose	Also done in 1-xtal
	PTP1B_is2-x0283-x0429	same site; same pose	Found in cluster 1
	PTP1B_is2-x0285-x0431 - event 5	same site; same pose	Found in cluster 1
	PTP1B_is2-x0262-x0374	same site; same pose	Found in cluster 2
	PTP1B_is2-x0267	same site; same pose	Also done in 1-xtal; found at cryo 1-BDC
	PTP1B_is2-x0260	same site; new pose	The ligand flips
	PTP1B_is2-x0227-x0252	same site; new pose	The ligand flips
	PTP1B_is2-x0258	same site; new pose*	Also done in 1-xtal; extended Lys density
	PTP1B_is2-x0222	same site; new pose*	Found at cryo 1-BDC; ligand binds the same but α6 helix is ordered at RT
	PTP1B_is2-x0256	same site; new pose**	Ligand flips
	PTP1B_is2-x0285-x0431 - event 1	new site	Found in cluster 1
	PTP1B_is2-x0225	new site	Opposite sides of the protein
