# Supplementary material for: Room-temperature crystallography reveals altered binding of small-molecule fragments to PTP1B
Source: eLife. 2023 Mar 7;12:e84632. doi: 10.7554/eLife.84632 (PMC9991056; doi:10.7554/eLife.84632)
Supplement: Table 2—source data 2. — H-bonds and non-H-bond interactions were calculated using Probe (Word et al., 1999) H-bonds are from ligand atoms to protein or water atoms. Other parameters were calculated using SwissADME (Daina et al., 2017). To test the significance of the difference in each parameter between the two fragment categories, Student’s t-tests were performed (*p<0.05, **p=0.054). [file elife-84632-table2-data2.csv]

	Average MW	Average # rotatable bonds	Average # H-bonds	Average # non-H-bonds	Average iLOGP
new pose and/or new site (n=14)	196.9	2.36	1.60**	66.0*	1.9*
same site; same pose (n=15)	202.5	2	0.73**	43.8*	1.5*
